# Supplementary material for: A Numerical Assessment and Prediction for Meeting the Demand for Agricultural Water and Sustainable Development in Irrigation Area
Source: MDPI journal article supplement (doi:10.3390/rs15030571), 2023-01-18
Supplement: s1 [file s1]

## Supplementary Materials

A numerical assessment and prediction for meeting the demand for agricultural water and sustainable development in irrigation area

Qiyang Zhang<sup>1</sup>, Hui Qian<sup>2,3,\*</sup>, Panpan Xu<sup>2,3</sup>, Rui Liu<sup>4</sup>, Xianmin Ke<sup>2,3</sup>, Alex Furman<sup>5</sup> and Jiatao Shang<sup>2,3</sup>

<sup>1</sup> School of Architecture and Civil Engineering, Xi'an University of Science and Technology, Xi'an 710054, China;

<sup>2</sup> School of Water and Environment, Chang'an University, Xi'an 710054, China;

<sup>3</sup> Key Laboratory of Subsurface Hydrology and Ecological Effects in Arid Region of the Ministry of Education, Chang'an University, Xi'an 710054, China

<sup>4</sup> Northwest Engineering Corporation Limited, Xi'an 710054, China

<sup>5</sup> Department of Civil and Environmental Engineering, Technion, Haifa 32000, Israel

\*Correspondence: qianhui@chd.edu.cn

Table S1. Statistical results of meteorological data in the study area.

| Precipitation    |                 |             | Evaporation                 |                            |              | Temperature |          |         |
|------------------|-----------------|-------------|-----------------------------|----------------------------|--------------|-------------|----------|---------|
| Max.             | Min.            | MA          | Max.                        | Min.                       | MA           | Max.        | Min.     | Mean    |
| 91.9 mm<br>(Aug) | 5.3 mm<br>(Dec) | 548.5<br>mm | 436.9 mm<br>(Jun to<br>Aug) | 75.7 mm<br>(Dec to<br>Feb) | 1003.1<br>mm | 44.2 °C     | -15.8 °C | 13.4 °C |

Notes: MA is the multi-year average values.

Table S2. The recharge parameter values of groundwater in the model.

| Month | Recharge (mm/a) |        |        |        |        |        |
|-------|-----------------|--------|--------|--------|--------|--------|
|       | Zone 1          | Zone 2 | Zone 3 | Zone 4 | Zone 5 | Zone 6 |
| 1     | 2.66            | 100.07 | 110.73 | 96.34  | 84.36  | 12.93  |
| 2     | 2.11            | -1.05  | 7.38   | 11.72  | 9.37   | 10.14  |
| 3     | 1.34            | -1.81  | 3.56   | 0.88   | 0.7    | 6.31   |
| 4     | 0.46            | 97.86  | 99.69  | -9.65  | -9.92  | 1.89   |
| 5     | 0.13            | 97.54  | 98.08  | -8.18  | -8.31  | 0.28   |
| 6     | 0.16            | 97.57  | 98.22  | -10.98 | -11.03 | 0.42   |
| 7     | 0.27            | 97.67  | 98.74  | -21.99 | -22.29 | 0.94   |
| 8     | 0.54            | 97.95  | 100.1  | -36.59 | -36.89 | 2.3    |
| 9     | 0.82            | 98.23  | 101.52 | -77.66 | -78.14 | 3.72   |
| 10    | 1.47            | 98.88  | 104.76 | -86.83 | -88.63 | 6.96   |
| 11    | 1.62            | 99.03  | 105.51 | 4.98   | 4.37   | 7.7    |
| 12    | 2.71            | 100.12 | 110.96 | 61.51  | 60.06  | 13.16  |

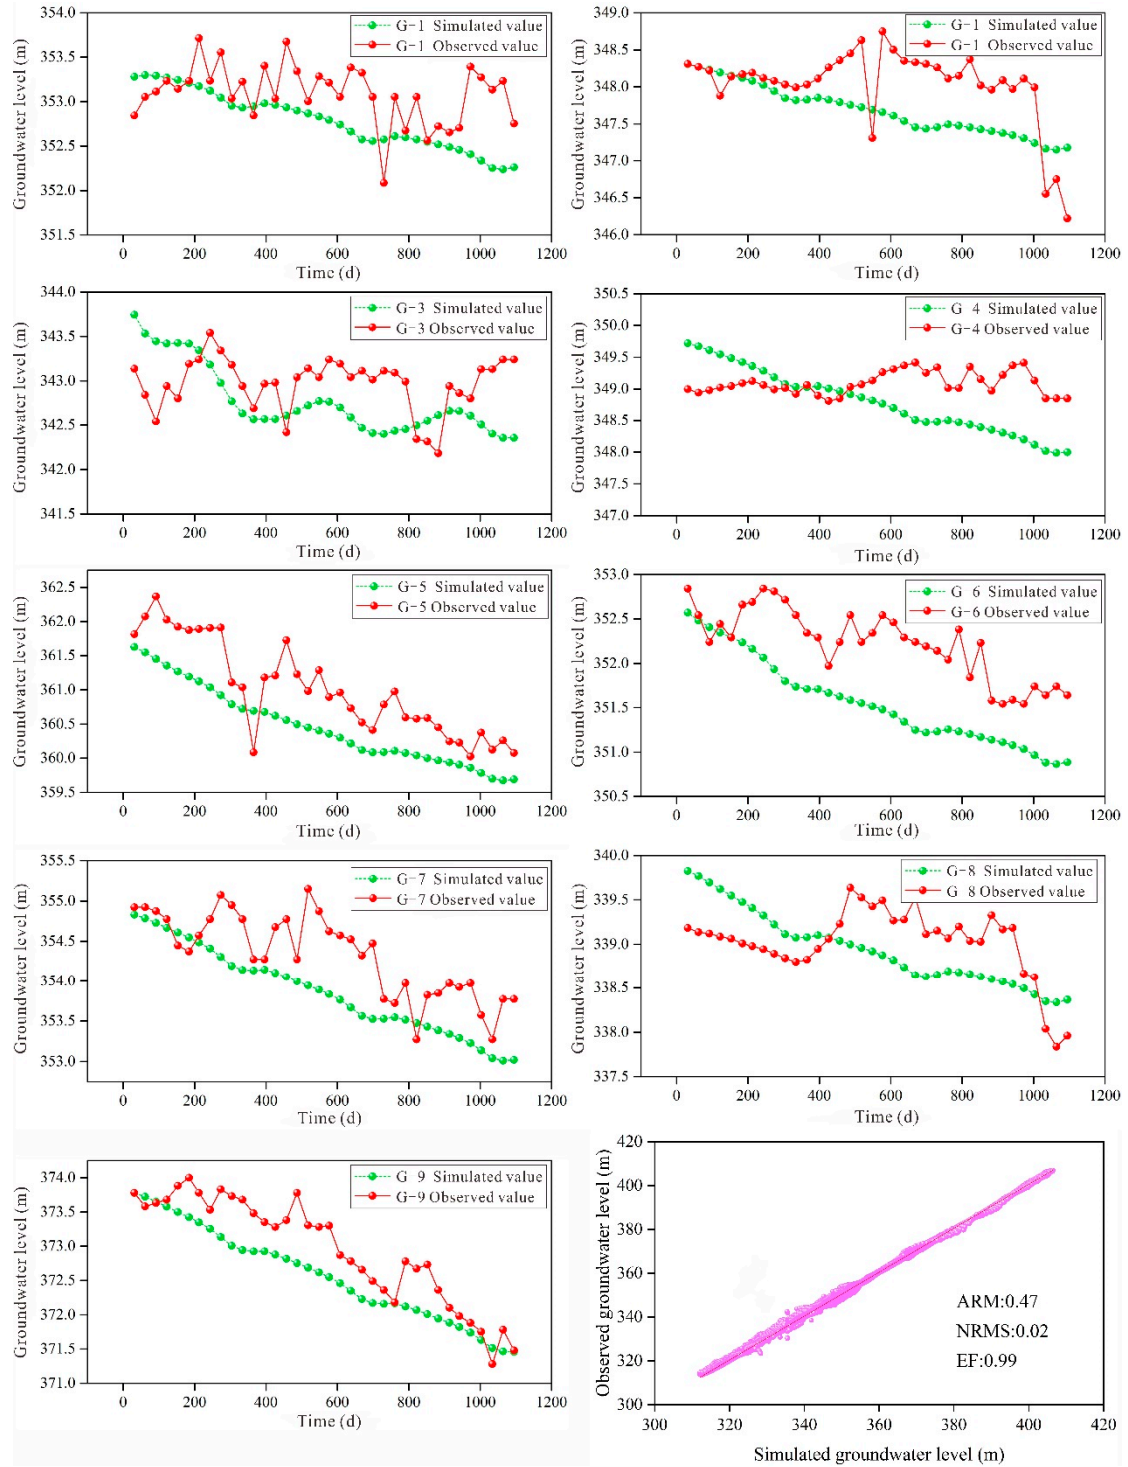

Figure S1 Observed and simulated groundwater levels at the monitoring wells. The insets depict temporal variations over one year in calculated water levels (green lines) as compared to field measurements (red lines) at 9 selected observation wells. Water levels are shown in meters (m) above sea level.

Table S3. Groundwater and surface water allocation for scenario 1.

| Month | Surface water supply (10 <sup>4</sup> m <sup>3</sup> ) | Groundwater supply (10 <sup>4</sup> m <sup>3</sup> ) |
|-------|--------------------------------------------------------|------------------------------------------------------|
| 1     |                                                        | 339.9                                                |
| 2     |                                                        | 642.2                                                |
| 3     |                                                        | 1153.7                                               |
| 4     |                                                        | 234.5                                                |
| 5     |                                                        | 2900                                                 |
| 6     | 1445                                                   | 1250.2                                               |
| 7     | 1445                                                   | 658.2                                                |
| 8     | 1445                                                   | 407.2                                                |
| 11    |                                                        | 321.4                                                |
| 12    |                                                        | 266.4                                                |
| Total | 4335                                                   | 10284.2                                              |

Table S4. Groundwater and surface water allocation for scenario 2.

| Month | Surface water supply (10 <sup>4</sup> m <sup>3</sup> ) | Groundwater supply (10 <sup>4</sup> m <sup>3</sup> ) |
|-------|--------------------------------------------------------|------------------------------------------------------|
| 1     | 113.30                                                 | 226.60                                               |
| 2     | 214.07                                                 | 428.13                                               |
| 3     | 384.57                                                 | 769.13                                               |
| 4     | 781.67                                                 | 1563.33                                              |
| 5     | 966.67                                                 | 1250.20                                              |
| 6     | 1445.00                                                | 1250.20                                              |
| 7     | 1445.00                                                | 658.20                                               |
| 8     | 1445.00                                                | 407.20                                               |
| 11    | 107.13                                                 | 214.27                                               |
| 12    | 88.80                                                  | 177.60                                               |
| Total | 6991.21                                                | 7627.99                                              |

Table S5. Observation well water level changes in 50 years for scenario 2.

| Observation wells | Initial water level (m) | Water level after 50 years (m) | Depth of groundwater after 50 years (m) |
|-------------------|-------------------------|--------------------------------|-----------------------------------------|
| G-1               | 354.37                  | 352.66                         | 1.71                                    |
| G-2               | 347.84                  | 344.87                         | 2.97                                    |
| G-3               | 343.11                  | 339.88                         | 3.23                                    |
| G-4               | 343.64                  | 338.49                         | 5.15                                    |
| G-5               | 360.43                  | 353.93                         | 6.50                                    |
| G-6               | 352.68                  | 348.24                         | 4.44                                    |
| G-7               | 354.78                  | 347.62                         | 7.16                                    |
| G-8               | 339.93                  | 336.47                         | 3.46                                    |
| G-9               | 372.95                  | 362.82                         | 10.13                                   |

Table S6. Water resources allocation plan during the water level restoration period.

| Month | Surface water supply ( $10^4 \text{ m}^3$ ) | Groundwater supply ( $10^4 \text{ m}^3$ ) |
|-------|---------------------------------------------|-------------------------------------------|
| 1     | 339.9                                       |                                           |
| 2     | 642.2                                       |                                           |
| 3     | 1153.7                                      |                                           |
| 4     | 2345                                        |                                           |
| 5     | 2900                                        |                                           |
| 6     | 1445                                        | 1250.2                                    |
| 7     | 1445                                        | 658.2                                     |
| 8     | 1445                                        | 407.2                                     |
| 11    | 321.4                                       |                                           |
| 12    | 266.4                                       |                                           |
| Total | 12303.6                                     | 2315.6                                    |

Table S7. Water resources allocation plan after water level restoration for predictive model (scenario 3).

| Month | Surface water supply ( $10^4 \text{ m}^3$ ) | Groundwater supply ( $10^4 \text{ m}^3$ ) |
|-------|---------------------------------------------|-------------------------------------------|
| 1     | 239.1                                       | 100.8                                     |
| 2     | 388.2                                       | 254                                       |
| 3     | 790.9                                       | 362.8                                     |
| 4     | 1599.2                                      | 745.8                                     |
| 5     | 1985.7                                      | 914.3                                     |
| 6     | 1445                                        | 1250.2                                    |
| 7     | 1445                                        | 658.2                                     |
| 8     | 1445                                        | 407.2                                     |
| 11    | 220.6                                       | 100.8                                     |
| 12    | 145.5                                       | 120.9                                     |
| Total | 9704.2                                      | 4915.1                                    |

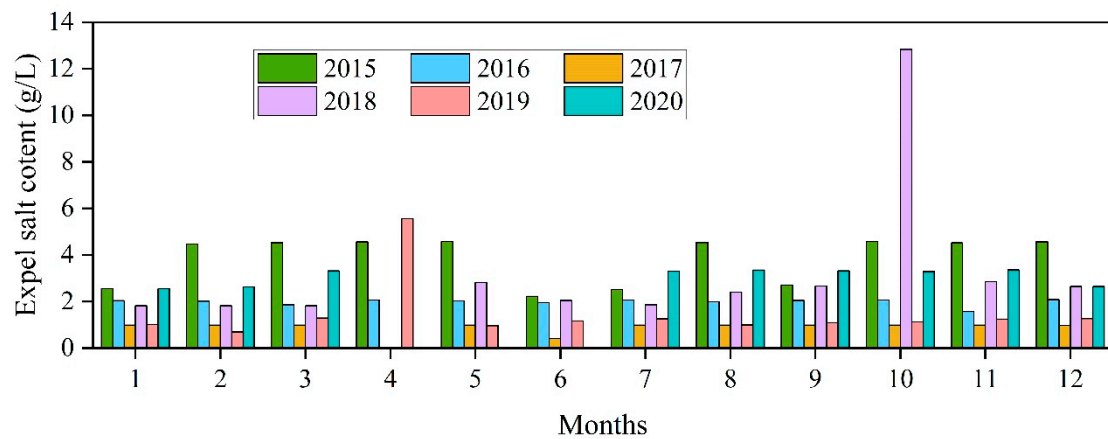

Figure S2 Change in salt discharge from drains in the study area from 2015 to 2020.

*The specific calculation process of the critical depth*

The specific calculation process of the critical depth of the study area is as follows:

$$H_e = 2.59 \times M^{0.142} - 1$$

where  $H_e$  is the critical depth,  $M$  is the salinity.

According to the information of Jiaokou Irrigation District, the salinity of floodplain and first terrace of Wei River is 1.5 g/L (maximum), and the second terrace and loess plateau are 15 g/L (maximum). Therefore, the critical burial depth determined to be in the first terrace and floodplain is 1.74 m, and the critical burial depth on the second terrace of the Wei River and the loess plateau is 2.8 m.

Table S8. Observation well water level changes in 50 years for scenario 3.

| Observation wells | Initial water level (m) | Water level after 50 years (m) | Depth of groundwater after 50 years (m) |
|-------------------|-------------------------|--------------------------------|-----------------------------------------|
| G-1               | 354.37                  | 354.13                         | 0.24                                    |
| G-2               | 347.84                  | 347.12                         | 0.72                                    |
| G-3               | 343.11                  | 342.15                         | 0.96                                    |
| G-4               | 343.64                  | 342.01                         | 1.63                                    |
| G-5               | 360.43                  | 357.52                         | 2.91                                    |
| G-6               | 352.68                  | 351.05                         | 1.63                                    |
| G-7               | 354.78                  | 351.99                         | 2.79                                    |
| G-8               | 339.93                  | 338.35                         | 1.58                                    |
| G-9               | 372.95                  | 368.40                         | 4.55                                    |
